# Supplementary material for: Immune Checkpoints OX40 and OX40L in Small-Cell Lung Cancer: Predict Prognosis and Modulate Immune Microenvironment
Source: Front Oncol. 2021 Nov 25;11:713853. doi: 10.3389/fonc.2021.713853 (PMC8652148; doi:10.3389/fonc.2021.713853)
Supplement: Supplementary file 11 [file Table_1.xlsx]

## Sheet: Table S1
Table S1. Original data of the whole cohort (n=143)
Sample-ID	Age, years	Gender	Smoking history	stage	Pathology review	OX40 expression on Tumor cells	OX40 xpression status on tumor cells	OX40 expression on TILs	OX40 expression status on TILs	OX40L expression on tumor cells	OX40L xpression status on tumor cells	OX40L expression on TILs	OX40L expression status on TILs	OX40 mutation status26	OX40L mutation status26
1	67	male	smoker	3	SCLC	0	Negative	20	Positive	0	Negative	10	Negative	NA	NA
2	74	male	smoker	3	SCLC	0	Negative	10	Positive	0	Negative	0	Negative	NA	NA
3	55	male	non-smmoker	1	SCLC	0	Negative	30	Positive	0	Negative	0	Negative	NA	NA
4	76	male	non-smmoker	1	SCLC	0	Negative	0	Negative	0	Negative	0	Negative	NA	NA
5	58	male	non-smmoker	2	SCLC	0	Negative	10	Positive	0	Negative	5	Negative	NA	NA
6	52	male	non-smmoker	3	SCLC	0	Negative	10	Positive	0	Negative	0	Negative	NA	NA
7	55	male	non-smmoker	1	SCLC	0	Negative	5	Positive	0	Negative	1	Negative	NA	NA
8	51	male	non-smmoker	3	SCLC	90	Positive	0	Negative	0	Negative	0	Negative	NA	NA
9	76	male	smoker	3	SCLC	0	Negative	5	Positive	0	Negative	30	Positive	NA	NA
10	47	female	non-smmoker	3	SCLC	0	Negative	5	Positive	0	Negative	10	Negative	NA	NA
11	65	female	non-smmoker	3	SCLC	0	Negative	5	Positive	0	Negative	2	Negative	NA	NA
12	73	male	non-smmoker	3	SCLC	0	Negative	2	Positive	90	Positive	40	Positive	NA	NA
13	56	male	non-smmoker	3	SCLC	0	Negative	0	Negative	0	Negative	5	Negative	NA	NA
14	66	male	smoker	3	SCLC	0	Negative	1	Positive	0	Negative	20	Positive	NA	NA
15	72	male	non-smmoker	3	SCLC	0	Negative	2	Positive	30	Negative	5	Negative	NA	NA
16	58	male	smoker	3	SCLC	0	Negative	0	Negative	0	Negative	0	Negative	NA	NA
17	68	female	non-smmoker	3	SCLC	0	Negative	10	Positive	0	Negative	2	Negative	NA	NA
18	60	male	non-smmoker	2	SCLC	0	Negative	2	Positive	0	Negative	0	Negative	NA	NA
19	67	male	non-smmoker	2	SCLC	0	Negative	5	Positive	0	Negative	20	Positive	NA	NA
20	43	female	non-smmoker	2	SCLC	0	Negative	2	Positive	10	Negative	30	Positive	NA	NA
21	76	male	non-smmoker	3	SCLC	50	Positive	0	Negative	0	Negative	0	Negative	NA	NA
22	53	male	non-smmoker	1	SCLC	0	Negative	10	Positive	0	Negative	5	Negative	NA	NA
23	60	male	smoker	3	SCLC	0	Negative	5	Positive	0	Negative	1	Negative	NA	NA
24	51	female	non-smmoker	3	SCLC	0	Negative	0	Negative	0	Negative	0	Negative	NA	NA
25	52	male	non-smmoker	3	SCLC	0	Negative	0	Negative	0	Negative	0	Negative	NA	NA
26	78	male	non-smmoker	1	SCLC	0	Negative	5	Positive	0	Negative	0	Negative	NA	NA
27	54	male	non-smmoker	3	SCLC	0	Negative	10	Positive	0	Negative	0	Negative	NA	NA
28	74	male	non-smmoker	3	SCLC	0	Negative	2	Positive	0	Negative	0	Negative	NA	NA
29	60	male	non-smmoker	2	SCLC	0	Negative	2	Positive	0	Negative	0	Negative	NA	NA
30	68	female	non-smmoker	3	SCLC	5	Negative	0	Negative	0	Negative	0	Negative	NA	NA
31	66	female	non-smmoker	2	SCLC	0	Negative	10	Positive	0	Negative	0	Negative	NA	NA
32	73	male	non-smmoker	1	SCLC	0	Negative	5	Positive	0	Negative	10	Negative	NA	NA
33	65	male	non-smmoker	2	SCLC	90	Positive	10	Positive	0	Negative	0	Negative	NA	NA
34	67	male	smoker	1	SCLC	30	Positive	10	Positive	0	Negative	10	Negative	NA	NA
35	73	female	non-smmoker	3	SCLC	0	Negative	5	Positive	0	Negative	5	Negative	NA	NA
36	75	male	smoker	1	SCLC	0	Negative	10	Positive	0	Negative	5	Negative	NA	NA
37	59	male	smoker	2	SCLC	0	Negative	5	Positive	0	Negative	10	Negative	NA	NA
38	75	male	smoker	1	SCLC	0	Negative	0	Negative	0	Negative	1	Negative	NA	NA
39	65	male	smoker	1	SCLC	0	Negative	5	Positive	0	Negative	30	Positive	NA	NA
40	63	female	non-smmoker	1	SCLC	0	Negative	5	Positive	0	Negative	30	Positive	NA	NA
41	57	male	smoker	3	SCLC	30	Positive	10	Positive	5	Negative	30	Positive	NA	NA
42	40	male	non-smmoker	1	SCLC	0	Negative	2	Positive	0	Negative	0	Negative	NA	NA
43	42	male	smoker	2	SCLC	0	Negative	2	Positive	0	Negative	0	Negative	NA	NA
44	58	male	non-smmoker	2	SCLC	0	Negative	0	Negative	0	Negative	1	Negative	NA	NA
45	54	male	smoker	3	SCLC	0	Negative	10	Positive	0	Negative	0	Negative	NA	NA
46	72	male	smoker	3	SCLC	0	Negative	5	Positive	40	Negative	5	Negative	NA	NA
47	56	female	non-smmoker	2	SCLC	0	Negative	0	Negative	0	Negative	0	Negative	NA	NA
48	66	male	smoker	1	SCLC	0	Negative	5	Positive	0	Negative	10	Negative	NA	NA
49	70	male	smoker	3	SCLC	0	Negative	0	Negative	0	Negative	0	Negative	NA	NA
50	52	male	smoker	3	SCLC	0	Negative	40	Positive	0	Negative	40	Positive	NA	NA
51	66	male	smoker	3	SCLC	0	Negative	0	Negative	0	Negative	1	Negative	NA	NA
52	77	male	smoker	3	SCLC	0	Negative	10	Positive	0	Negative	30	Positive	NA	NA
53	63	female	non-smmoker	3	SCLC	0	Negative	0	Negative	0	Negative	1	Negative	NA	NA
54	74	male	smoker	3	SCLC	0	Negative	0	Negative	0	Negative	30	Positive	NA	NA
55	64	male	smoker	2	SCLC	0	Negative	5	Positive	70	Negative	30	Positive	NA	NA
56	67	male	non-smmoker	3	SCLC	0	Negative	0	Negative	0	Negative	0	Negative	NA	NA
57	81	male	smoker	1	SCLC	0	Negative	0	Negative	0	Negative	5	Negative	NA	NA
58	38	male	non-smmoker	1	SCLC	0	Negative	5	Positive	0	Negative	5	Negative	NA	NA
59	63	male	smoker	2	SCLC	0	Negative	5	Positive	0	Negative	5	Negative	NA	NA
60	76	male	non-smmoker	3	SCLC	0	Negative	5	Positive	0	Negative	5	Negative	NA	NA
61	68	male	non-smmoker	1	SCLC	5	Negative	5	Positive	0	Negative	0	Negative	NA	NA
62	61	male	non-smmoker	1	SCLC	0	Negative	10	Positive	0	Negative	20	Positive	NA	NA
63	72	male	smoker	1	SCLC	20	Negative	5	Positive	0	Negative	0	Negative	NA	NA
64	68	male	smoker	1	SCLC	0	Negative	0	Negative	0	Negative	0	Negative	NA	NA
65	61	female	non-smmoker	1	SCLC	0	Negative	10	Positive	0	Negative	10	Negative	NA	NA
66	49	male	smoker	3	SCLC	0	Negative	50	Positive	0	Negative	5	Negative	NA	NA
67	68	male	non-smmoker	3	SCLC	0	Negative	0	Negative	0	Negative	5	Negative	NA	NA
68	54	male	non-smmoker	2	SCLC	0	Negative	10	Positive	0	Negative	10	Negative	NA	NA
69	52	male	non-smmoker	1	SCLC	0	Negative	0	Negative	0	Negative	10	Negative	NA	NA
70	58	male	smoker	3	SCLC	0	Negative	1	Positive	0	Negative	0	Negative	NA	NA
71	63	male	smoker	3	SCLC	0	Negative	1	Positive	0	Negative	5	Negative	NA	NA
72	64	male	smoker	2	SCLC	0	Negative	5	Positive	0	Negative	5	Negative	NA	NA
73	51	male	smoker	2	SCLC	0	Negative	2	Positive	0	Negative	5	Negative	NA	NA
74	61	male	smoker	1	SCLC	0	Negative	5	Positive	0	Negative	1	Negative	NA	NA
75	68	male	non-smmoker	3	SCLC	0	Negative	0	Negative	0	Negative	50	Positive	NA	NA
76	62	male	smoker	2	SCLC	0	Negative	0	Negative	0	Negative	0	Negative	NA	NA
77	63	female	non-smmoker	3	SCLC	0	Negative	5	Positive	0	Negative	20	Positive	NA	NA
78	55	male	non-smmoker	3	SCLC	0	Negative	0	Negative	0	Negative	1	Negative	NA	NA
79	66	male	smoker	1	SCLC	0	Negative	0	Negative	0	Negative	0	Negative	NA	NA
80	73	male	smoker	2	SCLC	0	Negative	10	Positive	0	Negative	0	Negative	NA	NA
81	63	male	non-smmoker	1	SCLC	50	Positive	10	Positive	0	Negative	20	Positive	NA	NA
82	65	male	non-smmoker	1	SCLC	0	Negative	20	Positive	0	Negative	20	Positive	NA	NA
83	69	male	smoker	1	SCLC	0	Negative	10	Positive	0	Negative	5	Negative	NA	NA
84	42	male	non-smmoker	3	SCLC	0	Negative	10	Positive	0	Negative	2	Negative	NA	NA
85	70	female	non-smmoker	1	SCLC	90	Positive	0	Negative	90	Positive	0	Negative	NA	NA
86	51	male	non-smmoker	1	SCLC	0	Negative	10	Positive	0	Negative	2	Negative	NA	NA
87	60	male	non-smmoker	2	SCLC	0	Negative	10	Positive	0	Negative	20	Positive	NA	NA
88	68	male	smoker	3	SCLC	0	Negative	10	Positive	0	Negative	20	Positive	NA	NA
89	66	male	smoker	1	SCLC	0	Negative	20	Positive	0	Negative	20	Positive	NA	NA
90	72	male	smoker	1	SCLC	0	Negative	10	Positive	0	Negative	0	Negative	NA	NA
91	67	male	smoker	1	SCLC	0	Negative	5	Positive	0	Negative	40	Positive	NA	NA
92	63	female	non-smmoker	1	SCLC	0	Negative	10	Positive	0	Negative	5	Negative	NA	NA
93	63	male	non-smmoker	2	SCLC	0	Negative	0	Negative	0	Negative	0	Negative	NA	NA
94	78	male	smoker	1	SCLC	0	Negative	10	Positive	0	Negative	5	Negative	NA	NA
95	51	male	smoker	1	SCLC	0	Negative	10	Positive	0	Negative	10	Negative	NA	NA
96	69	male	smoker	1	SCLC	0	Negative	5	Positive	0	Negative	10	Negative	NA	NA
97	62	male	non-smmoker	1	SCLC	0	Negative	1	Positive	0	Negative	1	Negative	NA	NA
98	61	female	non-smmoker	1	SCLC	0	Negative	10	Positive	0	Negative	20	Positive	NA	NA
99	67	female	non-smmoker	1	SCLC	40	Positive	0	Negative	80	Negative	2	Negative	NA	NA
100	63	male	non-smmoker	3	SCLC	0	Negative	0	Negative	0	Negative	10	Negative	NA	NA
101	47	female	non-smmoker	2	SCLC	0	Negative	5	Positive	0	Negative	5	Negative	NA	NA
102	66	male	smoker	2	SCLC	0	Negative	1	Positive	0	Negative	0	Negative	NA	NA
103	66	male	smoker	4	SCLC	NA	NA	NA	NA	NA	NA	NA	NA	Mutation	Wild type
104	75	male	non-smmoker	2	SCLC	NA	NA	NA	NA	NA	NA	NA	NA	Mutation	Wild type
105	64	female	smoker	4	SCLC	NA	NA	NA	NA	NA	NA	NA	NA	Wild type	Wild type
106	67	male	smoker	4	SCLC	NA	NA	NA	NA	NA	NA	NA	NA	Wild type	Wild type
107	64	male	smoker	3	SCLC	NA	NA	NA	NA	NA	NA	NA	NA	Wild type	Wild type
108	69	male	smoker	4	SCLC	NA	NA	NA	NA	NA	NA	NA	NA	Wild type	Wild type
109	72	male	smoker	4	SCLC	NA	NA	NA	NA	NA	NA	NA	NA	Wild type	Wild type
110	74	male	smoker	4	SCLC	NA	NA	NA	NA	NA	NA	NA	NA	Wild type	Wild type
111	54	male	smoker	4	SCLC	NA	NA	NA	NA	NA	NA	NA	NA	Wild type	Wild type
112	62	male	non-smmoker	4	SCLC	NA	NA	NA	NA	NA	NA	NA	NA	Wild type	Wild type
113	71	male	smoker	4	SCLC	NA	NA	NA	NA	NA	NA	NA	NA	Wild type	Wild type
114	66	male	smoker	4	SCLC	NA	NA	NA	NA	NA	NA	NA	NA	Wild type	Wild type
115	69	male	smoker	4	SCLC	NA	NA	NA	NA	NA	NA	NA	NA	Wild type	Wild type
116	65	male	smoker	4	SCLC	NA	NA	NA	NA	NA	NA	NA	NA	Wild type	Wild type
117	82	male	non-smmoker	4	SCLC	NA	NA	NA	NA	NA	NA	NA	NA	Wild type	Wild type
118	67	male	non-smmoker	4	SCLC	NA	NA	NA	NA	NA	NA	NA	NA	Wild type	Wild type
119	71	male	smoker	4	SCLC	NA	NA	NA	NA	NA	NA	NA	NA	Wild type	Wild type
120	67	male	smoker	4	SCLC	NA	NA	NA	NA	NA	NA	NA	NA	Wild type	Wild type
121	67	male	smoker	4	SCLC	NA	NA	NA	NA	NA	NA	NA	NA	Wild type	Wild type
122	65	female	smoker	4	SCLC	NA	NA	NA	NA	NA	NA	NA	NA	Wild type	Wild type
123	77	male	smoker	4	SCLC	NA	NA	NA	NA	NA	NA	NA	NA	Wild type	Wild type
124	69	male	smoker	4	SCLC	NA	NA	NA	NA	NA	NA	NA	NA	Wild type	Wild type
125	60	male	smoker	3	SCLC	NA	NA	NA	NA	NA	NA	NA	NA	Wild type	Wild type
126	59	male	non-smmoker	3	SCLC	NA	NA	NA	NA	NA	NA	NA	NA	Wild type	Wild type
127	65	male	smoker	3	SCLC	NA	NA	NA	NA	NA	NA	NA	NA	Wild type	Wild type
128	65	male	smoker	3	SCLC	NA	NA	NA	NA	NA	NA	NA	NA	Wild type	Wild type
129	67	male	smoker	3	SCLC	NA	NA	NA	NA	NA	NA	NA	NA	Wild type	Wild type
130	60	male	smoker	3	SCLC	NA	NA	NA	NA	NA	NA	NA	NA	Wild type	Wild type
131	59	male	smoker	3	SCLC	NA	NA	NA	NA	NA	NA	NA	NA	Wild type	Wild type
132	66	male	smoker	3	SCLC	NA	NA	NA	NA	NA	NA	NA	NA	Wild type	Wild type
133	68	male	smoker	3	SCLC	NA	NA	NA	NA	NA	NA	NA	NA	Wild type	Wild type
134	63	male	smoker	3	SCLC	NA	NA	NA	NA	NA	NA	NA	NA	Wild type	Wild type
135	56	male	smoker	3	SCLC	NA	NA	NA	NA	NA	NA	NA	NA	Wild type	Wild type
136	42	female	non-smmoker	4	SCLC	NA	NA	NA	NA	NA	NA	NA	NA	Wild type	Wild type
137	69	male	smoker	3	SCLC	NA	NA	NA	NA	NA	NA	NA	NA	Wild type	Wild type
138	61	female	non-smmoker	3	SCLC	NA	NA	NA	NA	NA	NA	NA	NA	Wild type	Wild type
139	84	male	non-smmoker	3	SCLC	NA	NA	NA	NA	NA	NA	NA	NA	Wild type	Wild type
140	75	male	smoker	3	SCLC	NA	NA	NA	NA	NA	NA	NA	NA	Wild type	Wild type
141	76	male	smoker	4	SCLC	NA	NA	NA	NA	NA	NA	NA	NA	Wild type	Wild type
142	69	male	smoker	3	SCLC	NA	NA	NA	NA	NA	NA	NA	NA	Wild type	Wild type
143	66	male	smoker	4	SCLC	NA	NA	NA	NA	NA	NA	NA	NA	Wild type	Wild type
Abbreviation: NA, not available;SCLC, small cell lung cancer; TILs, tumor infiltrating lymphocytes.
